# Supplementary material for: NMR-Based Metabolite Profiling and the Application of STOCSY toward the Quality and Authentication Assessment of European EVOOs
Source: MDPI journal article supplement (doi:10.3390/molecules28041738), 2023-02-11
Supplement: s1 [file s1]

# Quality and Authentication Assessment of European EVOOs using NMR-based metabolite profiling and STOCSY

Stavros Beteinakis <sup>1</sup>, Anastasia Papachristodoulou <sup>1</sup>, Peter Kolb <sup>2</sup>, Paul Roesch <sup>2</sup>, Stephan Schwarzwinger <sup>3</sup>, Emmanuel Mikros <sup>4</sup>, and Maria Halabalaki <sup>1,\*</sup>

<sup>1</sup> Division of Pharmacognosy and Natural Products Chemistry, Department of Pharmacy, National and Kapodistrian University of Athens, Panepistimiopolis, Zografou, 15771, Athens, Greece

<sup>2</sup> NBNC—North Bavarian NMR Centre, University of Bayreuth, Universitätsstraße 30, 95447, and ALNuMed GmbH, Gottfried-Keim-Strasse 60, 95448, Bayreuth, Germany

<sup>3</sup> NBNC—North Bavarian NMR Centre, and ForN – Research Unit for Food Quality, and FLMR – Research Unit for German and European Food Law, University of Bayreuth, Universitätsstraße 30, 95447 Bayreuth, Germany

<sup>4</sup> Division of Pharmaceutical Chemistry, Department of Pharmacy, National and Kapodistrian University of Athens, Panepistimiopolis, Zografou, 15771, Athens, Greece

\* Correspondence: mariahal@pharm.uoa.gr

---

## Content

**Table S1.** Geographical origin of European samples.

**Table S2.** Geographical and botanical origin of Greek samples.

**Figure S1.** Multiple display of spectra from Spain, Italy and Greece. Quantitative variations are mainly observed across the field.

**Figure S2.** (a) PLS-DA scores scatter plot of the European sample set with a clear distinction of samples from Greece; (b) Permutation test with 500 permutations performed at the presented PLS-DA model with samples from Spain; (c) Respective permutation test with samples from Italy; (d) Respective permutation test with samples from Greece.

**Figure S3.** (a) OPLS-DA scores scatter plot with samples from Spain vs Italy; (b) Indicative CV scores scatter plot from the OPLS-DA model of Spain vs Italy; (c) Indicative S-plot from the OPLS-DA model of Spain vs Italy; (d) Indicative Coefficients plot from OPLS-DA model of Spain vs Italy; (e) OPLS-DA scores scatter plot with samples from Spain vs Greece; (f) OPLS-DA scores scatter plot with samples from Italy vs Greece.

**Table S3.** Statistically significant markers extracted from the respective OPLS-DA models of European oils. Variable ID (ppm), multiplicity/functional group, VIP and p(corr) values along with the respective class are presented.

**Figure S4.** (a) Permutation test with 500 permutations performed for PLS-DA model in Figure 2 with samples from Crete; (b) Respective permutation test with samples from North Aegean; (c) Respective permutation test with samples from Peloponnese.

**Figure S5.** (a) OPLS-DA scores scatter plot with samples from Crete vs North Aegean; (b) CV scores scatter plot from the OPLS-DA model of Crete vs North Aegean; (c) OPLS-DA scores scatter plot with samples from Crete vs Peloponnese; (d) CV scores scatter plot from the OPLS-DA model of Crete vs Peloponnese; (e) CV scores scatter plot from the OPLS-DA model of North Aegean vs Peloponnese.

**Table S4.** Statistically significant markers extracted from the respective OPLS-DA models of Greek oils. Variable ID (ppm), multiplicity/functional group, VIP and p(corr) values along with the respective class are presented.

**Figure S6.** Representative JRES spectrum of a Greek EVOO.

**Figure S7.** Representative 2D spectra of a Greek EVOO. (a) COSY; (b) HSQC-DEPT; (c) HMBC.

**Table S5.** <sup>1</sup>H NMR chemical shifts and assignments for EVOOs' metabolites identified. Multiplicity (J in Hz) and functional group are also presented.

**Figure S8.** STOCSY 1D pseudo-NMR spectra. Correlation coefficients to the other signals in the median olive oil NMR spectrum are color-encoded. (a) Triterpenes: “driver peak” was at 0.706 ppm; (b) Fatty acids: “driver peak” was at 1.190 ppm.

**Figure S9.** STOCSY 1D pseudo-NMR spectrum of squalene. Correlation coefficients to the other signals in the median EVOO NMR spectrum are color-encoded: “driver peak” was at 1.615 ppm.

**Figure S10.** STOCSY 1D pseudo-NMR spectrum of an unknown biomarker. Correlation coefficients to the other signals in the median olive oil NMR spectrum are color-encoded: “driver peak” was at 5.907 ppm.

**Figure S11.** Box plots of a selection of statistically significant markers in the European sample set. Specifically, Saturated fatty acids (SFAs), Squalene and Total Phenols are depicted (vertical axis expressed in normalized intensity). SPA: Spain, GRE: Greece, ITA: Italy.

**Figure S12.** Box plots of a selection of statistically significant markers in the Greek sample set. Specifically, Oleocanthal, SFAs and Unsaturated fatty acids (UFAs) are depicted (vertical axis expressed in normalized intensity).

**Table S1.** Geographical origin of European samples.

| ID    | Country               | Region                      | ID    | Country               | Region            |
|-------|-----------------------|-----------------------------|-------|-----------------------|-------------------|
| 13148 | blend EU              | blend EU                    | 13649 | ITA                   | ITA 100%          |
| 13150 | blend EU              | blend EU                    | 13651 | ITA                   | ITA 100%          |
| 13151 | ITA                   | DOP Terra di Bari           | 13655 | blend EU (SPA/GRE/IT) | blend EU          |
| 13153 | SPA                   | SPA 100%                    | 13656 | ITA                   | DOP Terra di Bari |
| 13157 | SPA                   | SPA 100%                    | 13660 | blend EU              | blend EU          |
| 13158 | ITA                   | ITA 100%                    | 13661 | GRE                   | GRE 100%          |
| 13160 | blend EU (SPA/GRE/IT) | blend EU                    | 13662 | ITA                   | ITA 100%          |
| 13161 | SPA                   | SPA 100%                    | 13667 | ITA                   | ITA 100%          |
| 13164 | SPA                   | SPA 100%                    | 13670 | GRE                   | Chania g.g.A.     |
| 13168 | SPA                   | SPA 100%                    | 13672 | GRE                   | GRE 100%          |
| 13172 | SPA                   | SPA 100%                    | 13673 | GRE                   | GRE 100%          |
| 13173 | GRE                   | PDO Sitia/Kreta             | 13674 | ITA                   | ITA 100%          |
| 13174 | GRE                   | GRE 100%                    | 13675 | ITA                   | ITA 100%          |
| 13176 | blend EU              | blend EU                    | 13677 | GRE                   | PDO Sitia/Kreta   |
| 13178 | blend EU              | blend EU                    | 13678 | ITA                   | DOP Terra di Bari |
| 13179 | blend EU              | blend EU                    | 13680 | SPA                   | SPA 100%          |
| 13180 | blend EU (SPA/GRE/IT) | blend EU                    | 13682 | SPA                   | SPA 100%          |
| 13181 | SPA                   | SPA 100%                    | 13683 | GRE                   | GRE 100%          |
| 13182 | SPA                   | SPA 100%                    | 13685 | GRE                   | GRE 100%          |
| 13183 | blend EU (SPA/GRE/IT) | blend EU                    | 13686 | GRE                   | GRE 100%          |
| 13184 | SPA                   | SPA 100%                    | 13687 | blend EU (SPA/GRE/IT) | blend EU          |
| 13186 | SPA                   | SPA 100%                    | 13691 | ITA                   | ITA 100%          |
| 13189 | blend EU              | blend EU                    | 13692 | blend EU (SPA/GRE/IT) | blend EU          |
| 13190 | GRE                   | GRE 100%                    | 13694 | blend EU              | blend EU          |
| 13191 | GRE                   | Chania g.g.A.               | 13698 | blend EU              | blend EU          |
| 13192 | ITA                   | DOP Terra di Bari           | 13699 | SPA                   | SPA 100%          |
| 13193 | blend EU (SPA/GRE/IT) | blend EU                    | 13702 | SPA                   | SPA 100%          |
| 13195 | blend EU              | blend EU                    | 13703 | SPA                   | SPA 100%          |
| 13196 | blend EU (SPA/GRE/IT) | blend EU                    | 13704 | ITA                   | DOP Terra di Bari |
| 13204 | SPA                   | SPA 100%                    | 13707 | GRE                   | PDO Sitia/Kreta   |
| 13602 | blend EU (SPA/GRE/IT) | blend EU                    | 13708 | ITA                   | DOP Terra di Bari |
| 13606 | GRE                   | GRE 100%                    | 13710 | GRE                   | PDO Sitia/Kreta   |
| 13607 | SPA                   | SPA 100%                    | 13711 | SPA                   | SPA 100%          |
| 13609 | blend EU              | blend EU                    | 13714 | ITA                   | DOP Terra di Bari |
| 13611 | GRE                   | PDO Sitia/Kreta             | 13715 | blend EU              | blend EU          |
| 13614 | GRE                   | GRE PDO                     | 13722 | blend EU              | blend EU          |
| 13615 | GRE                   | GRE 100%                    | 13723 | blend EU              | blend EU          |
| 13616 | SPA                   | SPA 100%                    | 13726 | SPA                   | blend EU          |
| 13619 | GRE                   | PDO Vorios Mylo-<br>potamos | 13727 | GRE                   | PDO Sitia/Kreta   |
| 13621 | blend EU              | blend EU                    | 13728 | ITA                   | DOP Terra di Bari |
| 13622 | blend EU              | blend EU                    | 13734 | SPA                   | SPA 100%          |
| 13623 | SPA                   | SPA 100%                    | 13735 | SPA                   | SPA 100%          |
| 13625 | SPA                   | SPA 100%                    | 13737 | blend EU              | blend EU          |
| 13627 | GRE                   | PDO Vorios Mylo-<br>potamos | 13739 | ITA                   | DOP Terra di Bari |
| 13631 | blend EU              | blend EU                    | 13740 | SPA                   | SPA 100%          |

| ID    | Country  | Region                 | ID    | Country               | Region            |
|-------|----------|------------------------|-------|-----------------------|-------------------|
| 13632 | blend EU | blend EU               | 13743 | GRE                   | GRE 100%          |
| 13633 | GRE      | PDO Vorios Mylopotamos | 13746 | blend EU              | blend EU          |
| 13635 | ITA      | ITA 100%               | 13747 | GRE                   | GRE 100%          |
| 13638 | SPA      | SPA 100%               | 13748 | GRE                   | GRE 100%          |
| 13641 | GRE      | PDO Sitia/Kreta        | 13750 | GRE                   | PDO Sitia/Kreta   |
| 13642 | GRE      | GRE 100%               | 13751 | SPA                   | SPA 100%          |
| 13645 | blend EU | blend EU               | 13752 | ITA                   | DOP Terra di Bari |
| 13646 | blend EU | blend EU               | 13753 | SPA                   | SPA 100%          |
| 13647 | GRE      | GRE 100%               | 13755 | blend EU (SPA/GRE/IT) | blend EU          |
| 13648 | SPA      | SPA 100%               | 13756 | blend EU (SPA/GRE/IT) | blend EU          |

\*ITA: Italy, SPA: Spain and GRE: Greece

**Table S2.** Geographical and botanical origin of Greek samples.

| ID     | Region                   | Subregion                        | Variety                       |
|--------|--------------------------|----------------------------------|-------------------------------|
| LSCR91 | North Aegean-Crete       | North Aegean 90%-Crete 10%       | Koroneiki                     |
| LSCR82 | North Aegean-Crete       | North Aegean 80%-Crete 20%       | Koroneiki                     |
| LSCR73 | North Aegean-Crete       | North Aegean 70%-Crete 30%       | Koroneiki                     |
| LSCR64 | North Aegean-Crete       | North Aegean 60%-Crete 40%       | Koroneiki                     |
| LSCR55 | North Aegean-Crete       | North Aegean 50%-Crete 50%       | Koroneiki                     |
| CRLS64 | North Aegean-Crete       | North Aegean 40%-Crete 60%       | Koroneiki                     |
| CRLS73 | North Aegean-Crete       | North Aegean 30%-Crete 70%       | Koroneiki                     |
| CRLS82 | North Aegean-Crete       | North Aegean 20%-Crete 80%       | Koroneiki                     |
| CRLS91 | North Aegean-Crete       | North Aegean 10%-Crete 90%       | Koroneiki                     |
| LSPL91 | North Aegean-Peloponnese | North Aegean 90%-Peloponnese 10% | Koroneiki                     |
| LSPL82 | North Aegean-Peloponnese | North Aegean 80%-Peloponnese 20% | Koroneiki                     |
| LSPL73 | North Aegean-Peloponnese | North Aegean 80%-Peloponnese 20% | Koroneiki                     |
| LSPL64 | North Aegean-Peloponnese | North Aegean 80%-Peloponnese 20% | Koroneiki                     |
| LSPL55 | North Aegean-Peloponnese | North Aegean 80%-Peloponnese 20% | Koroneiki                     |
| PLLS64 | North Aegean-Peloponnese | North Aegean 80%-Peloponnese 20% | Koroneiki                     |
| PLLS73 | North Aegean-Peloponnese | North Aegean 80%-Peloponnese 20% | Koroneiki                     |
| PLLS82 | North Aegean-Peloponnese | North Aegean 80%-Peloponnese 20% | Koroneiki                     |
| PLLS91 | North Aegean-Peloponnese | North Aegean 80%-Peloponnese 20% | Koroneiki                     |
| KRAD91 | North Aegean             | Lesvos                           | Koroneiki 90%-Adramitiani 10% |
| KRAD82 | North Aegean             | Lesvos                           | Koroneiki 80%-Adramitiani 20% |
| KRAD73 | North Aegean             | Lesvos                           | Koroneiki 70%-Adramitiani 30% |
| KRAD64 | North Aegean             | Lesvos                           | Koroneiki 60%-Adramitiani 40% |
| ADKR55 | North Aegean             | Lesvos                           | Koroneiki 50%-Adramitiani 50% |
| ADKR64 | North Aegean             | Lesvos                           | Koroneiki 40%-Adramitiani 60% |
| ADKR73 | North Aegean             | Lesvos                           | Koroneiki 30%-Adramitiani 70% |
| ADKR82 | North Aegean             | Lesvos                           | Koroneiki 20%-Adramitiani 80% |
| ADKR91 | North Aegean             | Lesvos                           | Koroneiki 10%-Adramitiani 90% |
| CRPL91 | Crete-Peloponnese        | Crete 90%-Peloponnese 10%        | Koroneiki                     |
| CRPL82 | Crete-Peloponnese        | Crete 80%-Peloponnese 20%        | Koroneiki                     |
| CRPL73 | Crete-Peloponnese        | Crete 70%-Peloponnese 30%        | Koroneiki                     |
| CRPL64 | Crete-Peloponnese        | Crete 60%-Peloponnese 40%        | Koroneiki                     |
| PLCR55 | Crete-Peloponnese        | Crete 50%-Peloponnese 50%        | Koroneiki                     |
| PLCR64 | Crete-Peloponnese        | Crete 40%-Peloponnese 60%        | Koroneiki                     |

| ID     | Region            | Subregion                 | Variety                    |
|--------|-------------------|---------------------------|----------------------------|
| PLCR73 | Crete-Peloponnese | Crete 30%-Peloponnese 70% | Koroneiki                  |
| PLCR82 | Crete-Peloponnese | Crete 20%-Peloponnese 80% | Koroneiki                  |
| PLCR91 | Crete-Peloponnese | Crete 10%-Peloponnese 90% | Koroneiki                  |
| KLKR91 | North Aegean      | Lesvos                    | Kolovi 90%-Koroneiki 10%   |
| KLKR82 | North Aegean      | Lesvos                    | Kolovi 80%-Koroneiki 20%   |
| KLKR73 | North Aegean      | Lesvos                    | Kolovi 70%-Koroneiki 30%   |
| KLKR64 | North Aegean      | Lesvos                    | Kolovi 60%-Koroneiki 40%   |
| KRKL55 | North Aegean      | Lesvos                    | Kolovi 50%-Koroneiki 50%   |
| KRKL64 | North Aegean      | Lesvos                    | Kolovi 40%-Koroneiki 60%   |
| KRKL73 | North Aegean      | Lesvos                    | Kolovi 30%-Koroneiki 70%   |
| KRKL82 | North Aegean      | Lesvos                    | Kolovi 20%-Koroneiki 80%   |
| KRKL91 | North Aegean      | Lesvos                    | Kolovi 10%-Koroneiki 90%   |
| KLAD91 | North Aegean      | Lesvos                    | Kolovi 90%-Adramitiani 10% |
| KLAD82 | North Aegean      | Lesvos                    | Kolovi 80%-Adramitiani 20% |
| KLAD73 | North Aegean      | Lesvos                    | Kolovi 70%-Adramitiani 30% |
| KLAD64 | North Aegean      | Lesvos                    | Kolovi 60%-Adramitiani 40% |
| ADKL55 | North Aegean      | Lesvos                    | Kolovi 50%-Adramitiani 50% |
| ADKL64 | North Aegean      | Lesvos                    | Kolovi 40%-Adramitiani 60% |
| ADKL73 | North Aegean      | Lesvos                    | Kolovi 30%-Adramitiani 70% |
| ADKL82 | North Aegean      | Lesvos                    | Kolovi 20%-Adramitiani 80% |
| ADKL91 | North Aegean      | Lesvos                    | Kolovi 10%-Adramitiani 90% |
| KLAO1  | Crete             | Lasithi                   | Koroneiki                  |
| KLAO2  | Crete             | Lasithi                   | Koroneiki                  |
| KLAO3  | Crete             | Lasithi                   | Koroneiki                  |
| KLAO4  | Crete             | Lasithi                   | Koroneiki                  |
| KLAO5  | Crete             | Lasithi                   | Koroneiki                  |
| KLAO6  | Crete             | Lasithi                   | Koroneiki                  |
| KLAO7  | Crete             | Lasithi                   | Koroneiki                  |
| KLO1   | North Aegean      | Lesvos                    | Koroneiki                  |
| KLLO2  | North Aegean      | Lesvos                    | Kolovi                     |
| KLLO3  | North Aegean      | Lesvos                    | Kolovi                     |
| KLLO4  | North Aegean      | Lesvos                    | Kolovi                     |
| KLLO5  | North Aegean      | Lesvos                    | Kolovi                     |
| KLO6   | North Aegean      | Lesvos                    | Koroneiki                  |
| KLLO7  | North Aegean      | Lesvos                    | Kolovi                     |
| KLO8   | North Aegean      | Lesvos                    | Koroneiki                  |
| KLO9   | North Aegean      | Lesvos                    | Koroneiki                  |
| ALO10  | North Aegean      | Lesvos                    | Adramitiani                |
| KLLO11 | North Aegean      | Lesvos                    | Kolovi                     |
| KLLO12 | North Aegean      | Lesvos                    | Kolovi                     |
| KLLO13 | North Aegean      | Lesvos                    | Kolovi                     |
| KLO14  | North Aegean      | Lesvos                    | Koroneiki                  |
| KLLO15 | North Aegean      | Lesvos                    | Kolovi                     |
| KLO16  | North Aegean      | Lesvos                    | Koroneiki                  |
| KRO1   | Crete             | Rethymno                  | Koroneiki                  |
| KRO2   | Crete             | Rethymno                  | Koroneiki                  |
| KRO3   | Crete             | Rethymno                  | Koroneiki                  |
| KRO4   | Crete             | Rethymno                  | Koroneiki                  |

| ID      | Region         | Subregion | Variety    |
|---------|----------------|-----------|------------|
| KRO5    | Crete          | Rethymno  | Koroneiki  |
| KRO6    | Crete          | Rethymno  | Koroneiki  |
| KRO7    | Crete          | Rethymno  | Koroneiki  |
| KRO8    | Crete          | Rethymno  | Koroneiki  |
| KHO1    | Crete          | Herakleio | Koroneiki  |
| KHO2    | Crete          | Herakleio | Koroneiki  |
| KHO3    | Crete          | Herakleio | Koroneiki  |
| KHO4    | Crete          | Herakleio | Koroneiki  |
| KHO5    | Crete          | Herakleio | Koroneiki  |
| KHO6    | Crete          | Herakleio | Koroneiki  |
| KHO7    | Crete          | Herakleio | Koroneiki  |
| KHO8    | Crete          | Herakleio | Koroneiki  |
| KHO9    | Crete          | Herakleio | Koroneiki  |
| KHO10   | Crete          | Herakleio | Koroneiki  |
| KHO11   | Crete          | Herakleio | Koroneiki  |
| KHO12   | Crete          | Herakleio | Koroneiki  |
| KRCH1   | Crete          | Chania    | Koroneiki  |
| KRCH2   | Crete          | Chania    | Koroneiki  |
| KRCH3   | Crete          | Chania    | Koroneiki  |
| KRCH4   | Crete          | Chania    | Koroneiki  |
| KRCH5   | Crete          | Chania    | Koroneiki  |
| KRCH6   | Crete          | Chania    | Koroneiki  |
| KRCH7   | Crete          | Chania    | Koroneiki  |
| KRCH8   | Crete          | Chania    | Koroneiki  |
| KRCH9   | Crete          | Chania    | Koroneiki  |
| KMO1    | Peloponnese    | Messinia  | Koroneiki  |
| KMO2    | Peloponnese    | Messinia  | Koroneiki  |
| KMO3    | Peloponnese    | Messinia  | Koroneiki  |
| KMO4    | Peloponnese    | Messinia  | Koroneiki  |
| KMO5    | Peloponnese    | Messinia  | Koroneiki  |
| KMO6    | Peloponnese    | Messinia  | Koroneiki  |
| KMO7    | Peloponnese    | Messinia  | Koroneiki  |
| KMO8    | Peloponnese    | Messinia  | Koroneiki  |
| KMO9    | Peloponnese    | Messinia  | Koroneiki  |
| KMO10   | Peloponnese    | Messinia  | Koroneiki  |
| KMO11   | Peloponnese    | Messinia  | Koroneiki  |
| KMO12   | Peloponnese    | Messinia  | Koroneiki  |
| KLLK2   | Peloponnese    | Lakonia   | Unknown    |
| MXLK1   | Peloponnese    | Lakonia   | Unknown    |
| KULK3   | Peloponnese    | Lakonia   | Unknown    |
| KRLK4   | Peloponnese    | Lakonia   | Koroneiki  |
| AKZO1   | Ionian Islands | Zakynthos | Koroneiki  |
| AMAO1   | Peloponnese    | Argolida  | Megaritiki |
| AM-NAO1 | Peloponnese    | Argolida  | Manaki     |
| AKFO1   | Peloponnese    | Messinia  | Koroneiki  |
| AKZO2   | Ionian Islands | Zakynthos | Koroneiki  |
| ANZO1   | Ionian Islands | Zakynthos | Ntopia     |

---

| ID    | Region         | Subregion | Variety   |
|-------|----------------|-----------|-----------|
| AKKO1 | Peloponnese    | Messinia  | Koroneiki |
| AKKO2 | Peloponnese    | Messinia  | Koroneiki |
| ATKO1 | Ionian Islands | Kefalonia | Thiaki    |

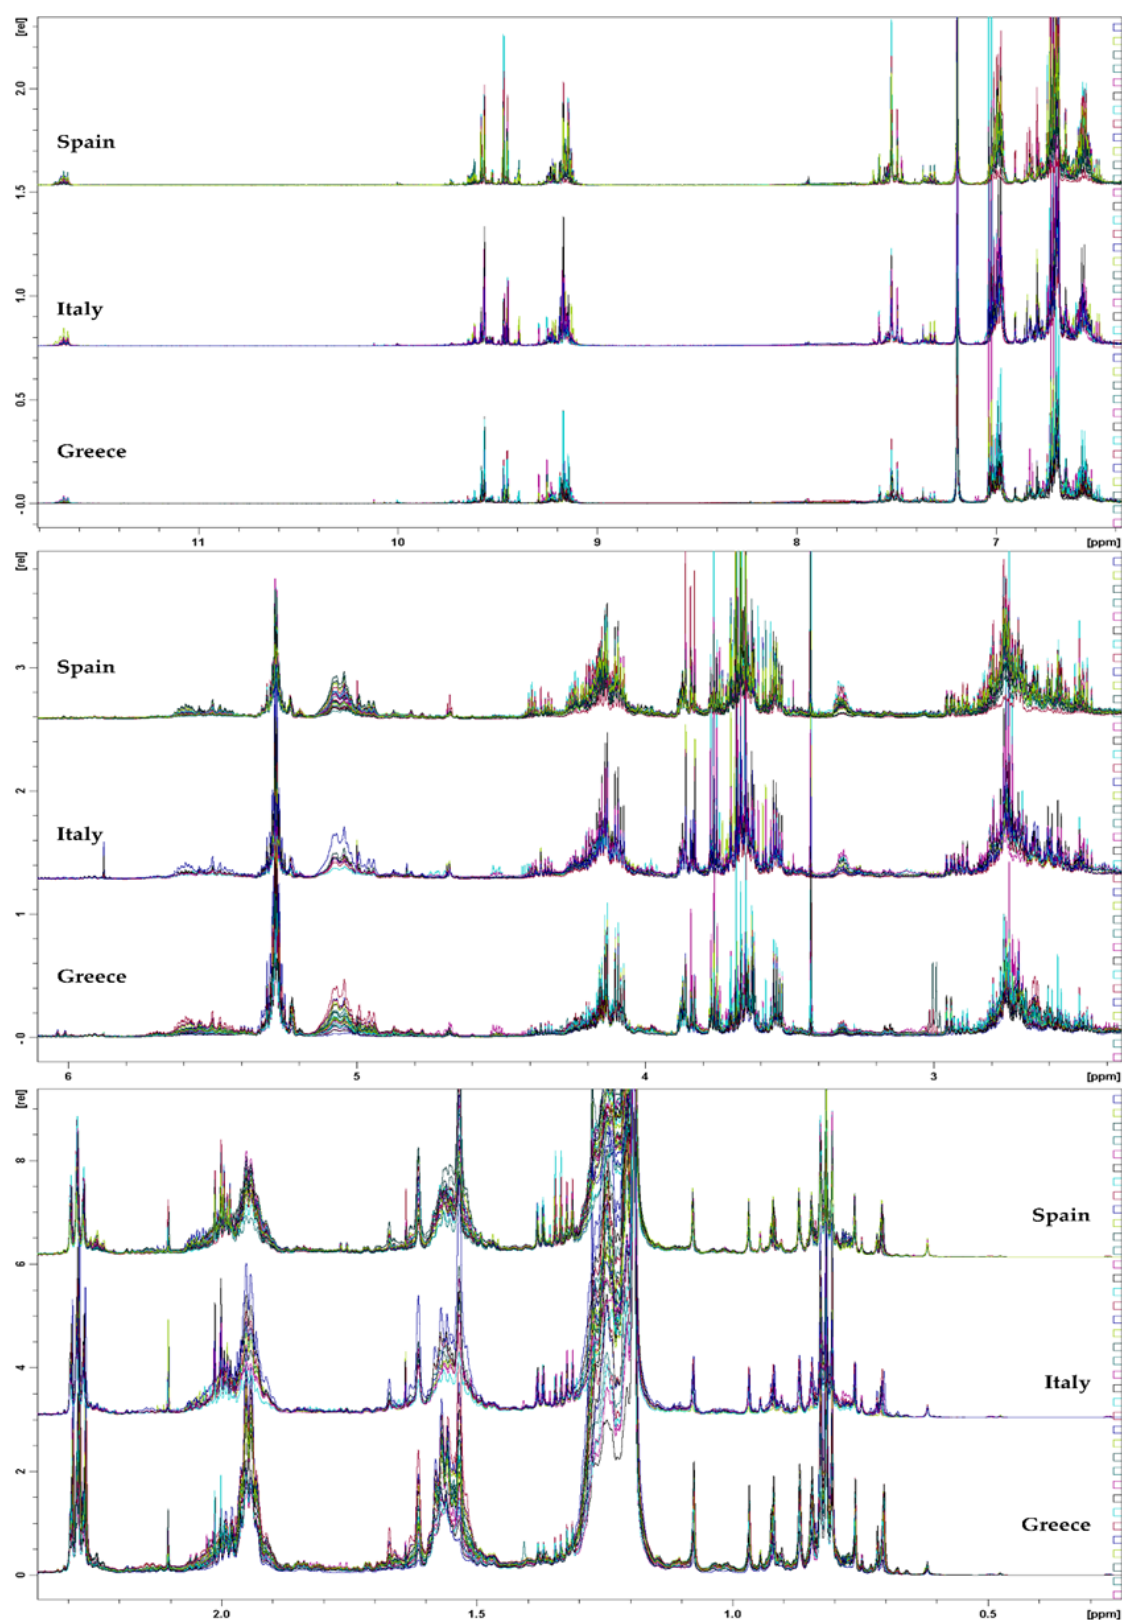

**Figure S1.** Multiple display of spectra from Spain, Italy and Greece. Quantitative variations are mainly observed across the field.

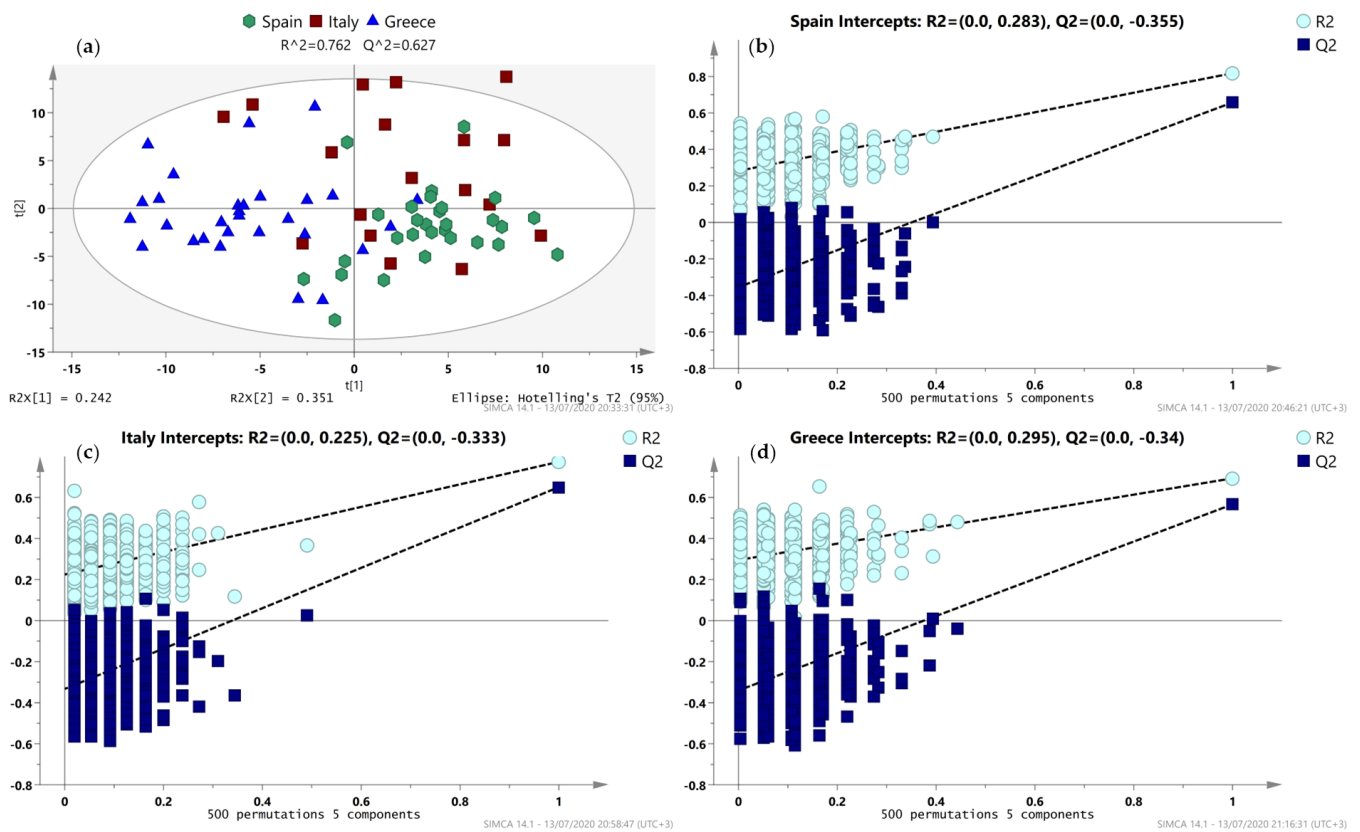

**Figure S2.** (a) PLS-DA scores scatter plot of the European sample set with a clear distinction of samples from Greece; (b) Permutation test with 500 permutations performed at the presented PLS-DA model with samples from Spain; (c) Respective permutation test with samples from Italy; (d) Respective permutation test with samples from Greece.

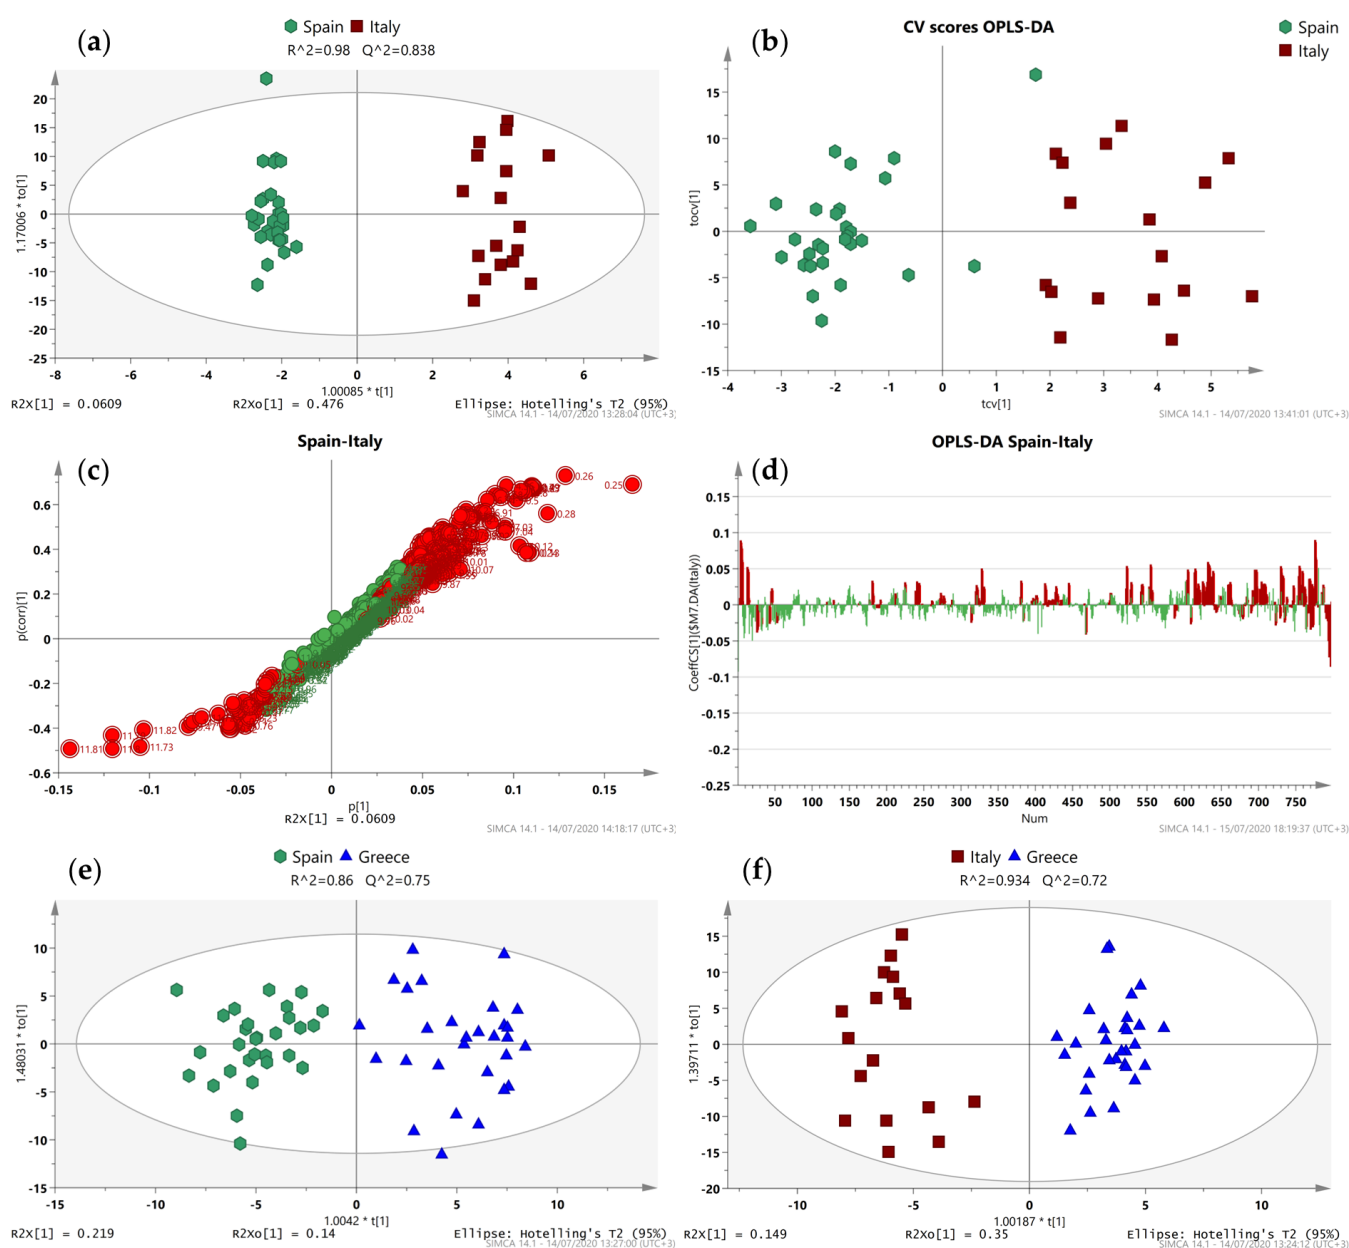

**Figure S3.** (a) OPLS-DA scores scatter plot with samples from Spain vs Italy; (b) Indicative CV scores scatter plot from the OPLS-DA model of Spain vs Italy; (c) Indicative S-plot from the OPLS-DA model of Spain vs Italy; (d) Indicative Coefficients plot from OPLS-DA model of Spain vs Italy; (e) OPLS-DA scores scatter plot with samples from Spain vs Greece; (f) OPLS-DA scores scatter plot with samples from Italy vs Greece.

**Table S3.** Statistically significant markers extracted from the respective OPLS-DA models of European oils. Variable ID (ppm), multiplicity/functional group, VIP and p(corr) values along with the respective class are presented.

| No                        | Var ID | Multiplicity / Functional group | Proposed Compound                                                            | VIP     | p(corr) | Class  |
|---------------------------|--------|---------------------------------|------------------------------------------------------------------------------|---------|---------|--------|
| OPLS-DA / Italy vs Greece |        |                                 |                                                                              |         |         |        |
| 1                         | 0.48   | s / -CH <sub>3</sub> (H-18)     | Gramisterol/citrostadienol/ $\Delta^7$ -avenasterol/ $\Delta^7$ -campesterol | 1.57376 | 0.70169 | Greece |
| 2                         | 0.71   | s / -CH <sub>3</sub>            | Triterpene                                                                   | 1.85219 | 0.75826 | Greece |
| 3                         | 0.76   | s / -CH <sub>3</sub>            | Triterpene                                                                   | 1.73687 | 0.76891 | Greece |
| 4                         | 0.8    | t / -CH <sub>3</sub>            | Saturated, oleic and/or $\omega$ -7 acyl groups                              | 1.63301 | 0.73946 | Greece |

| No                               | Var ID | Multiplicity / Functional group       | Proposed Compound                                                            | VIP     | p(corr)  | Class  |
|----------------------------------|--------|---------------------------------------|------------------------------------------------------------------------------|---------|----------|--------|
| 5                                | 0.84   | overlapping signal / -CH <sub>3</sub> | Triterpene /Linoleic acyl groups                                             | 1.96608 | 0.80001  | Greece |
| 6                                | 0.85   | s / -CH <sub>3</sub>                  | Triterpene                                                                   | 1.58902 | 0.71504  | Greece |
| 7                                | 0.87   | s / -CH <sub>3</sub>                  | Triterpene                                                                   | 1.78751 | 0.75057  | Greece |
| 8                                | 0.92   | s / -CH <sub>3</sub>                  | Triterpene                                                                   | 1.88684 | 0.79808  | Greece |
| 9                                | 0.97   | s / -CH <sub>3</sub>                  | Triterpene                                                                   | 1.76052 | 0.75217  | Greece |
| 10                               | 1.08   | s / -CH <sub>3</sub>                  | Triterpene                                                                   | 1.75453 | 0.73571  | Greece |
| 11                               | 4.36   | -                                     | Unknown                                                                      | 1.30686 | -0.73187 | Italy  |
| 12                               | 5.22   | m / olefinic H (H-12)                 | Triterpene                                                                   | 2.05517 | 0.74127  | Greece |
| <b>OPLS-DA / Spain vs Italy</b>  |        |                                       |                                                                              |         |          |        |
| 1                                | 0.26   | d / -CH <sub>2</sub> - (exo, H-19)    | Cycloartenol/cyclobranol/24-methylenecycloartanol                            | 2.69135 | 0.73180  | Italy  |
| <b>OPLS-DA / Spain vs Greece</b> |        |                                       |                                                                              |         |          |        |
| 1                                | 0.48   | s / -CH <sub>3</sub> (H-18)           | Gramisterol/citrostadienol/ $\Delta^7$ -avenasterol/ $\Delta^7$ -campesterol | 1.57158 | 0.81217  | Greece |
| 2                                | 0.66   | -                                     | Unknown                                                                      | 1.68377 | 0.84102  | Greece |
| 3                                | 0.67   | -                                     | Unknown                                                                      | 1.41605 | 0.79866  | Greece |
| 4                                | 0.68   | -                                     | Unknown                                                                      | 1.85150 | 0.86148  | Greece |
| 5                                | 0.69   | -                                     | Unknown                                                                      | 1.50375 | 0.79145  | Greece |
| 6                                | 0.71   | s / -CH <sub>3</sub>                  | Triterpene                                                                   | 1.51902 | 0.82189  | Greece |
| 7                                | 0.72   | s / -CH <sub>3</sub>                  | Triterpene                                                                   | 1.90038 | 0.86625  | Greece |
| 8                                | 0.73   | s / -CH <sub>3</sub>                  | Triterpene                                                                   | 1.60446 | 0.85985  | Greece |
| 9                                | 0.76   | s / -CH <sub>3</sub>                  | Triterpene                                                                   | 1.47770 | 0.87314  | Greece |
| 10                               | 0.79   | s / -CH <sub>3</sub>                  | Triterpene                                                                   | 1.28447 | 0.81407  | Greece |
| 11                               | 0.82   | t / -CH <sub>3</sub>                  | Saturated, oleic and/or $\omega$ -7 acyl groups                              | 1.78416 | 0.83707  | Greece |
| 12                               | 0.84   | overlapping signal / -CH <sub>3</sub> | Triterpene /Linoleic acyl groups                                             | 1.79873 | 0.91611  | Greece |
| 13                               | 0.85   | s / -CH <sub>3</sub>                  | Triterpene                                                                   | 1.36544 | 0.79072  | Greece |
| 14                               | 0.87   | s / -CH <sub>3</sub>                  | Triterpene                                                                   | 1.56433 | 0.84776  | Greece |
| 15                               | 0.88   | -                                     | Unknown                                                                      | 1.49806 | 0.83271  | Greece |
| 16                               | 0.89   | -                                     | Unknown                                                                      | 1.60573 | 0.88304  | Greece |
| 17                               | 0.9    | -                                     | Unknown                                                                      | 1.39417 | 0.85199  | Greece |
| 18                               | 0.91   | -                                     | Unknown                                                                      | 1.40856 | 0.85011  | Greece |
| 19                               | 0.92   | s / -CH <sub>3</sub>                  | Triterpene                                                                   | 1.67697 | 0.89908  | Greece |
| 20                               | 0.93   | s / -CH <sub>3</sub>                  | Triterpene                                                                   | 1.60753 | 0.85442  | Greece |
| 21                               | 0.95   | s / -CH <sub>3</sub>                  | Triterpene                                                                   | 1.12868 | 0.72360  | Greece |
| 22                               | 0.97   | s / -CH <sub>3</sub>                  | Triterpene                                                                   | 1.54112 | 0.87273  | Greece |
| 23                               | 1      | -                                     | Unknown                                                                      | 1.26887 | 0.76788  | Greece |
| 24                               | 1.01   | -                                     | Unknown                                                                      | 1.39883 | 0.83934  | Greece |
| 25                               | 1.02   | -                                     | Unknown                                                                      | 1.17752 | 0.76622  | Greece |
| 26                               | 1.03   | -                                     | Unknown                                                                      | 1.50154 | 0.85059  | Greece |
| 27                               | 1.04   | -                                     | Unknown                                                                      | 1.22220 | 0.77273  | Greece |
| 28                               | 1.08   | s / -CH <sub>3</sub>                  | Triterpene                                                                   | 1.58526 | 0.85248  | Greece |
| 29                               | 1.1    | -                                     | Unknown                                                                      | 1.29374 | 0.80272  | Greece |
| 30                               | 1.11   | -                                     | Unknown                                                                      | 1.29219 | 0.79664  | Greece |
| 31                               | 1.12   | -                                     | Unknown                                                                      | 1.17649 | 0.73321  | Greece |
| 32                               | 1.14   | -                                     | Unknown                                                                      | 1.24096 | 0.75478  | Greece |

| No | Var ID | Multiplicity / Functional group             | Proposed Compound                     | VIP     | p(corr)  | Class  |
|----|--------|---------------------------------------------|---------------------------------------|---------|----------|--------|
| 33 | 1.19   | m / (-CH <sub>2</sub> -)n                   | Saturated fatty acid (SFA) chains     | 1.40242 | 0.82194  | Greece |
| 34 | 1.24   | m / (-CH <sub>2</sub> -)n                   | Unsaturated fatty acid (UFA) chains   | 1.77041 | 0.83468  | Greece |
| 35 | 1.4    | -                                           | Unknown                               | 1.33746 | 0.79922  | Greece |
| 36 | 1.46   | -                                           | Unknown                               | 1.23594 | 0.70613  | Greece |
| 37 | 1.48   | -                                           | Unknown                               | 1.22365 | 0.72721  | Greece |
| 38 | 1.57   | m / -OCO-CH <sub>2</sub> -CH <sub>2</sub> - | Triacylglycerols (TAGs) - Acyl groups | 1.72289 | 0.86111  | Greece |
| 39 | 1.85   | -                                           | Unknown                               | 1.18790 | 0.72523  | Greece |
| 40 | 1.95   | m / -CH <sub>2</sub> -CH=CH-                | TAGs - Acyl groups                    | 1.74848 | 0.83021  | Greece |
| 41 | 2.28   | m / -OCO-CH <sub>2</sub> -                  | TAGs - Acyl groups                    | 1.82255 | 0.86162  | Greece |
| 42 | 2.94   | d (J=9.6 Hz) / -CH(OH)-                     | Triterpene                            | 1.12645 | 0.71403  | Greece |
| 43 | 3.69   | -                                           | Unknown                               | 1.54239 | -0.75428 | Spain  |
| 44 | 3.86   | s / -OCH <sub>3</sub> (H-7')                | Acetoxypinoresinol                    | 1.15493 | 0.73396  | Greece |
| 45 | 3.87   | -                                           | Unknown                               | 1.08121 | 0.73010  | Greece |
| 46 | 5.22   | m / olefinic H (H-12)                       | Triterpene                            | 2.12264 | 0.90783  | Greece |
| 47 | 5.28   | m / -CH=CH-                                 | TAGs - Acyl groups                    | 1.94420 | 0.84567  | Greece |
| 48 | 5.39   | -                                           | Unknown                               | 1.44541 | 0.78876  | Greece |
| 49 | 9.41   | -CH=O                                       | Unknown                               | 1.56219 | -0.71737 | Spain  |
| 50 | 9.64   | -CH=O                                       | Unknown                               | 1.66357 | -0.70737 | Spain  |
| 51 | 9.65   | -CH=O                                       | Unknown                               | 1.70797 | -0.71366 | Spain  |
| 52 | 9.74   | -CH=O                                       | Unknown                               | 1.67958 | -0.74730 | Spain  |
| 53 | 11.7   | -OH                                         | Unknown                               | 1.83856 | -0.73099 | Spain  |
| 54 | 11.72  | -OH                                         | Unknown                               | 2.02786 | -0.71144 | Spain  |

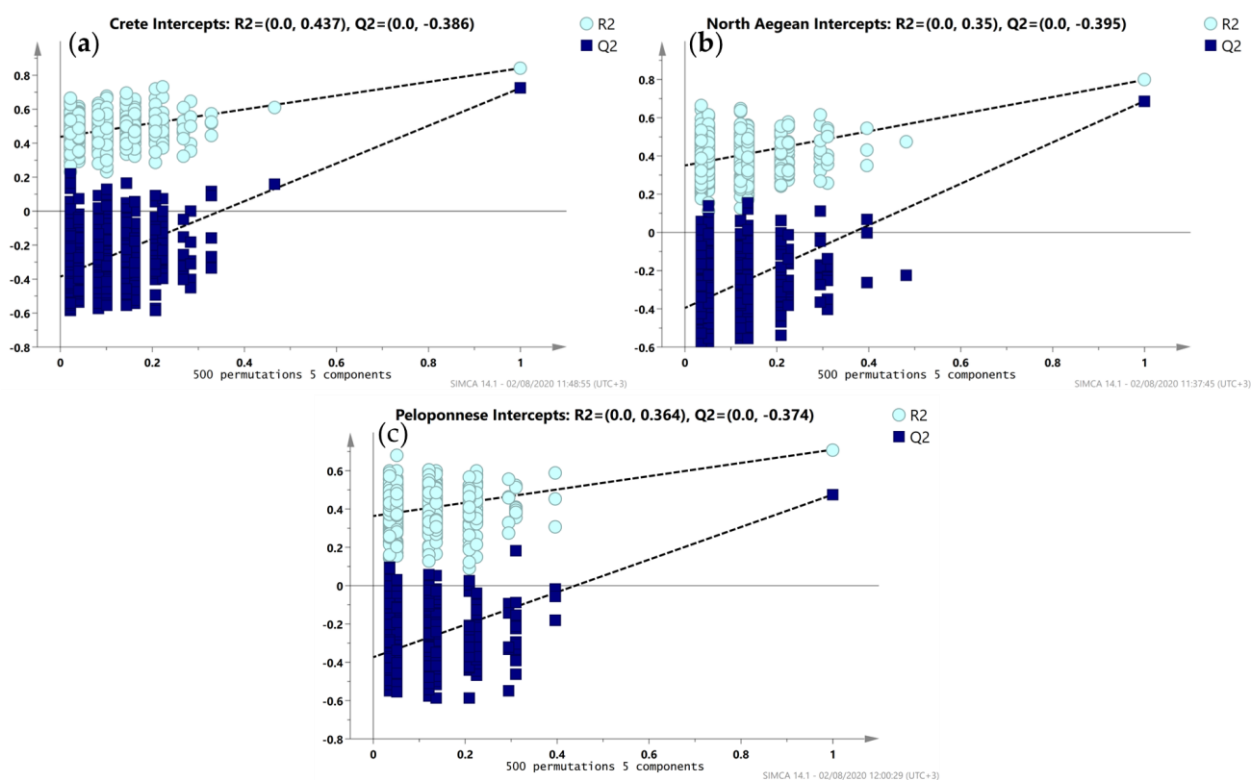

**Figure S4.** (a) Permutation test with 500 permutations performed for PLS-DA model in Figure 2 with samples from Crete; (b) Respective permutation test with samples from North Aegean; (c) Respective permutation test with samples from Peloponnese.

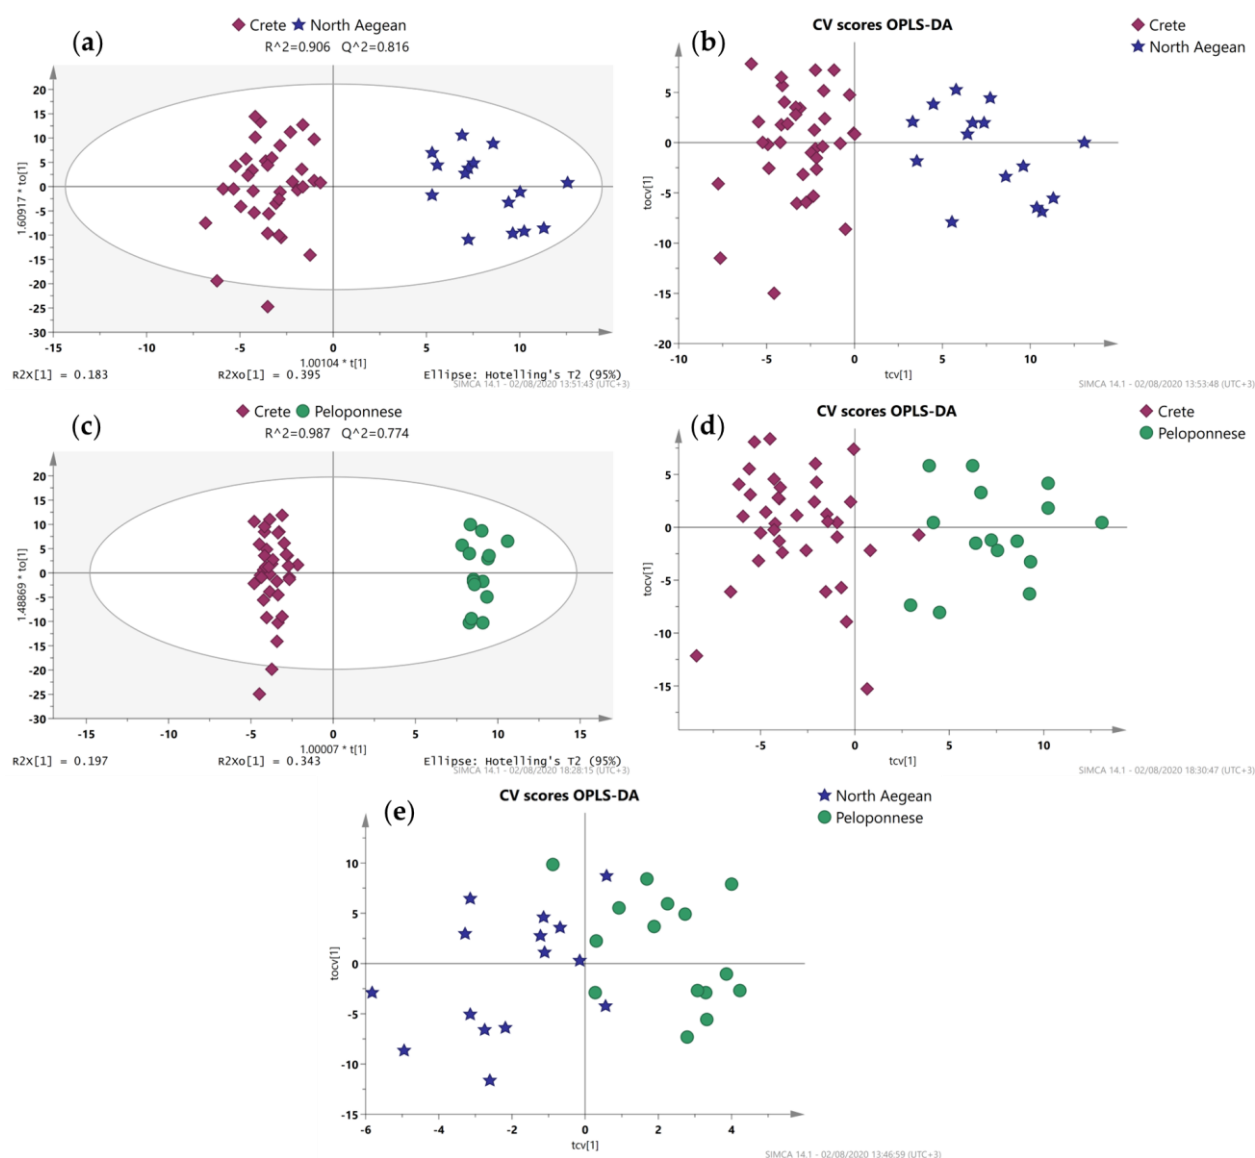

**Figure S5.** (a) OPLS-DA scores scatter plot with samples from Crete vs North Aegean; (b) CV scores scatter plot from the OPLS-DA model of Crete vs North Aegean; (c) OPLS-DA scores scatter plot with samples from Crete vs Peloponnese; (d) CV scores scatter plot from the OPLS-DA model of Crete vs Peloponnese; (e) CV scores scatter plot from the OPLS-DA model of North Aegean vs Peloponnese.

**Table S4.** Statistically significant markers extracted from the respective OPLS-DA models of Greek oils. Variable ID (ppm), multiplicity/functional group, VIP and p(corr) values along with the respective class are presented.

| No                                    | Var ID | Multiplicity / Functional group | Proposed Compound | VIP     | p(corr)   | Class        |
|---------------------------------------|--------|---------------------------------|-------------------|---------|-----------|--------------|
| OPLS-DA / North Aegean vs Peloponnese |        |                                 |                   |         |           |              |
| 1                                     | 5.89   | m                               | Unknown           | 2.51707 | -0.790794 | North Aegean |
| 2                                     | 5.9    | m                               | Unknown           | 2.82985 | -0.823117 | North Aegean |
| 3                                     | 5.91   | m                               | Unknown           | 2.39897 | -0.742319 | North Aegean |
| 4                                     | 5.92   | m                               | Unknown           | 2.15888 | -0.754852 | North Aegean |
| 5                                     | 6.05   | -                               | Unknown           | 2.25229 | -0.771316 | North Aegean |
| 6                                     | 6.4    | m                               | Unknown           | 2.4761  | -0.734855 | North Aegean |
| 7                                     | 6.42   | m                               | Unknown           | 2.80879 | -0.791951 | North Aegean |
| 8                                     | 6.43   | m                               | Unknown           | 2.293   | -0.775474 | North Aegean |

| No                                     | Var ID | Multiplicity / Functional group                                  | Proposed Compound     | VIP     | p(corr)   | Class        |
|----------------------------------------|--------|------------------------------------------------------------------|-----------------------|---------|-----------|--------------|
| 9                                      | 6.44   | m                                                                | Unknown               | 2.20413 | -0.786371 | North Aegean |
| 10                                     | 7.43   | -CH= (aromatic)                                                  | Unknown               | 2.50246 | -0.81262  | North Aegean |
| <b>OPLS-DA / Crete vs North Aegean</b> |        |                                                                  |                       |         |           |              |
| 1                                      | 0.72   | s / -CH <sub>3</sub>                                             | Triterpene            | 1.50238 | -0.704769 | Crete        |
| 2                                      | 2.93   | ddd (J=18.4/8.7/1.2 Hz) / -<br><u>CH<sub>2</sub></u> CH=O (H-4a) | Oleocanthal           | 1.42929 | -0.719699 | Crete        |
| 3                                      | 2.94   | d (J=9.6 Hz) / - <u>CH</u> (OH)-)                                | Triterpene            | 1.22126 | -0.743346 | Crete        |
| 4                                      | 3.15   | dd (J=4.5/11.3 Hz) / -<br><u>CH</u> (OH)-)                       | Triterpene            | 1.72675 | -0.848694 | Crete        |
| 5                                      | 3.17   | dd (J=4.5/11.3 Hz) / -<br><u>CH</u> (OH)-)                       | Triterpene            | 1.64105 | -0.785879 | Crete        |
| 6                                      | 5.23   | m / olefinic H (H-12)                                            | Triterpene            | 1.18199 | -0.730016 | Crete        |
| 7                                      | 9.22   | -                                                                | Unknown               | 1.5768  | -0.749416 | Crete        |
| 8                                      | 9.7    | -                                                                | Unknown               | 1.26164 | -0.708038 | Crete        |
| <b>OPLS-DA / Crete vs Peloponnese</b>  |        |                                                                  |                       |         |           |              |
| 1                                      | 2      | d (J=7.1 Hz) / -CH <sub>3</sub> (H-10)                           | Oleacein/Oleocanthal  | 1.48243 | -0.708224 | Crete        |
| 2                                      | 2.01   | d (J=7.1 Hz) / -CH <sub>3</sub> (H-10)                           | Oleocanthal           | 1.48572 | -0.706204 | Crete        |
| 3                                      | 2.93   | ddd (J=18.4/8.7/1.2 Hz) / -<br><u>CH<sub>2</sub></u> CH=O (H-4a) | Oleocanthal           | 1.34374 | -0.712692 | Crete        |
| 4                                      | 3.53   | dd (J=5.8/11.5 Hz) / -<br><u>CH<sub>2</sub></u> -OCO- (H-3'a)    | Glycerol in 1-MAG     | 1.10222 | -0.701298 | Crete        |
| 5                                      | 6.98   | d (J=8.5 Hz) / aromatic H<br>(H-4/H-8 or H-4'/H-8')              | Tyrosol & derivatives | 1.68536 | -0.733814 | Crete        |
| 6                                      | 6.99   | d (J=8.5 Hz) / aromatic H<br>(H-4/H-8 or H-4'/H-8')              | Tyrosol & derivatives | 1.59958 | -0.726112 | Crete        |
| 7                                      | 9.2    | -CH=O                                                            | Unknown               | 1.35654 | -0.712554 | Crete        |
| 8                                      | 9.7    | -CH=O                                                            | Unknown               | 1.39785 | -0.776816 | Crete        |
| <b>OPLS-DA / Koroneiki vs Kolovi</b>   |        |                                                                  |                       |         |           |              |
| 1                                      | 2.71   | t / (=HC-CH <sub>2</sub> -CH=)                                   | Linoleic acyl groups  | 1.91179 | 0.708193  | Kolovi       |
| 2                                      | 6.05   | -                                                                | Unknown               | 1.73997 | 0.846117  | Kolovi       |
| 3                                      | 6.11   | -                                                                | Unknown               | 1.4621  | 0.738442  | Kolovi       |
| 4                                      | 6.13   | -                                                                | Unknown               | 1.7987  | 0.869632  | Kolovi       |
| 5                                      | 7.43   | -CH= (aromatic)                                                  | Unknown               | 1.49286 | 0.715732  | Kolovi       |

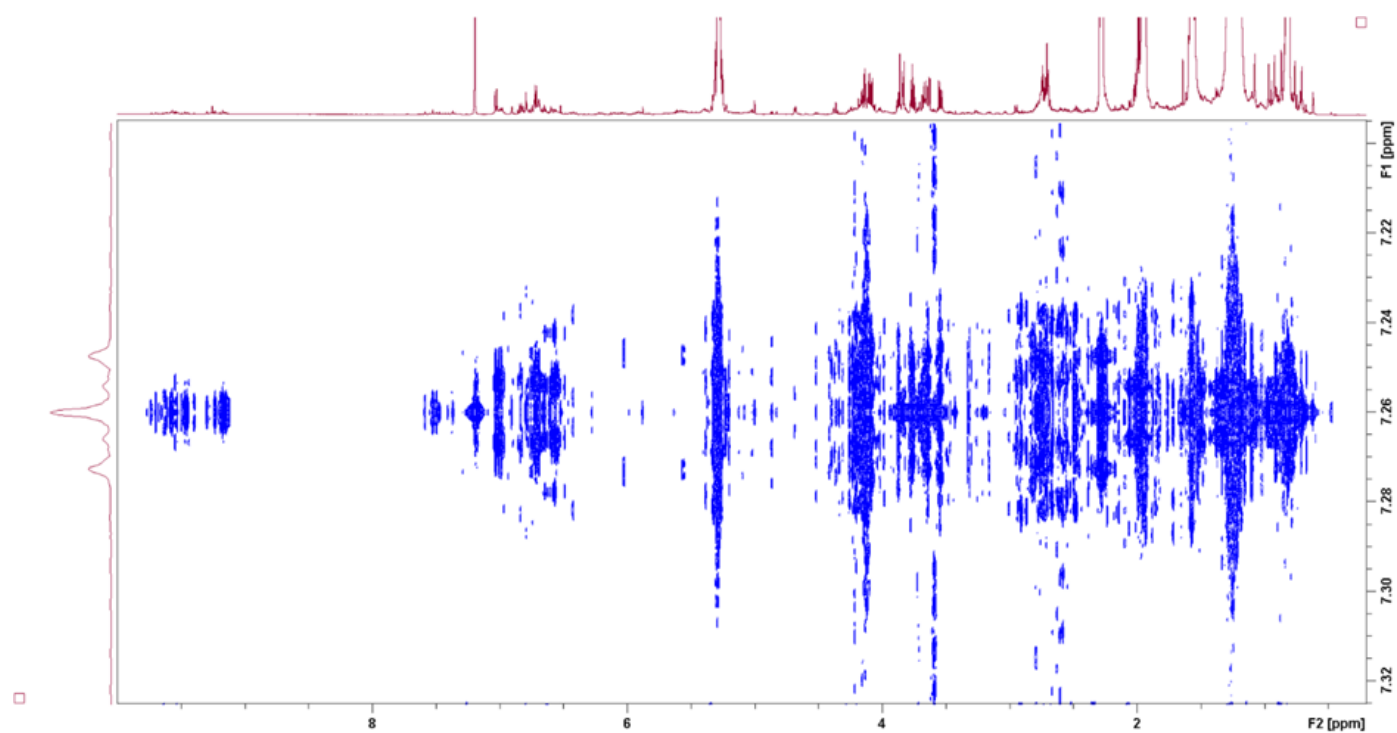

**Figure S6.** Representative JRES spectrum of a Greek EVOO.

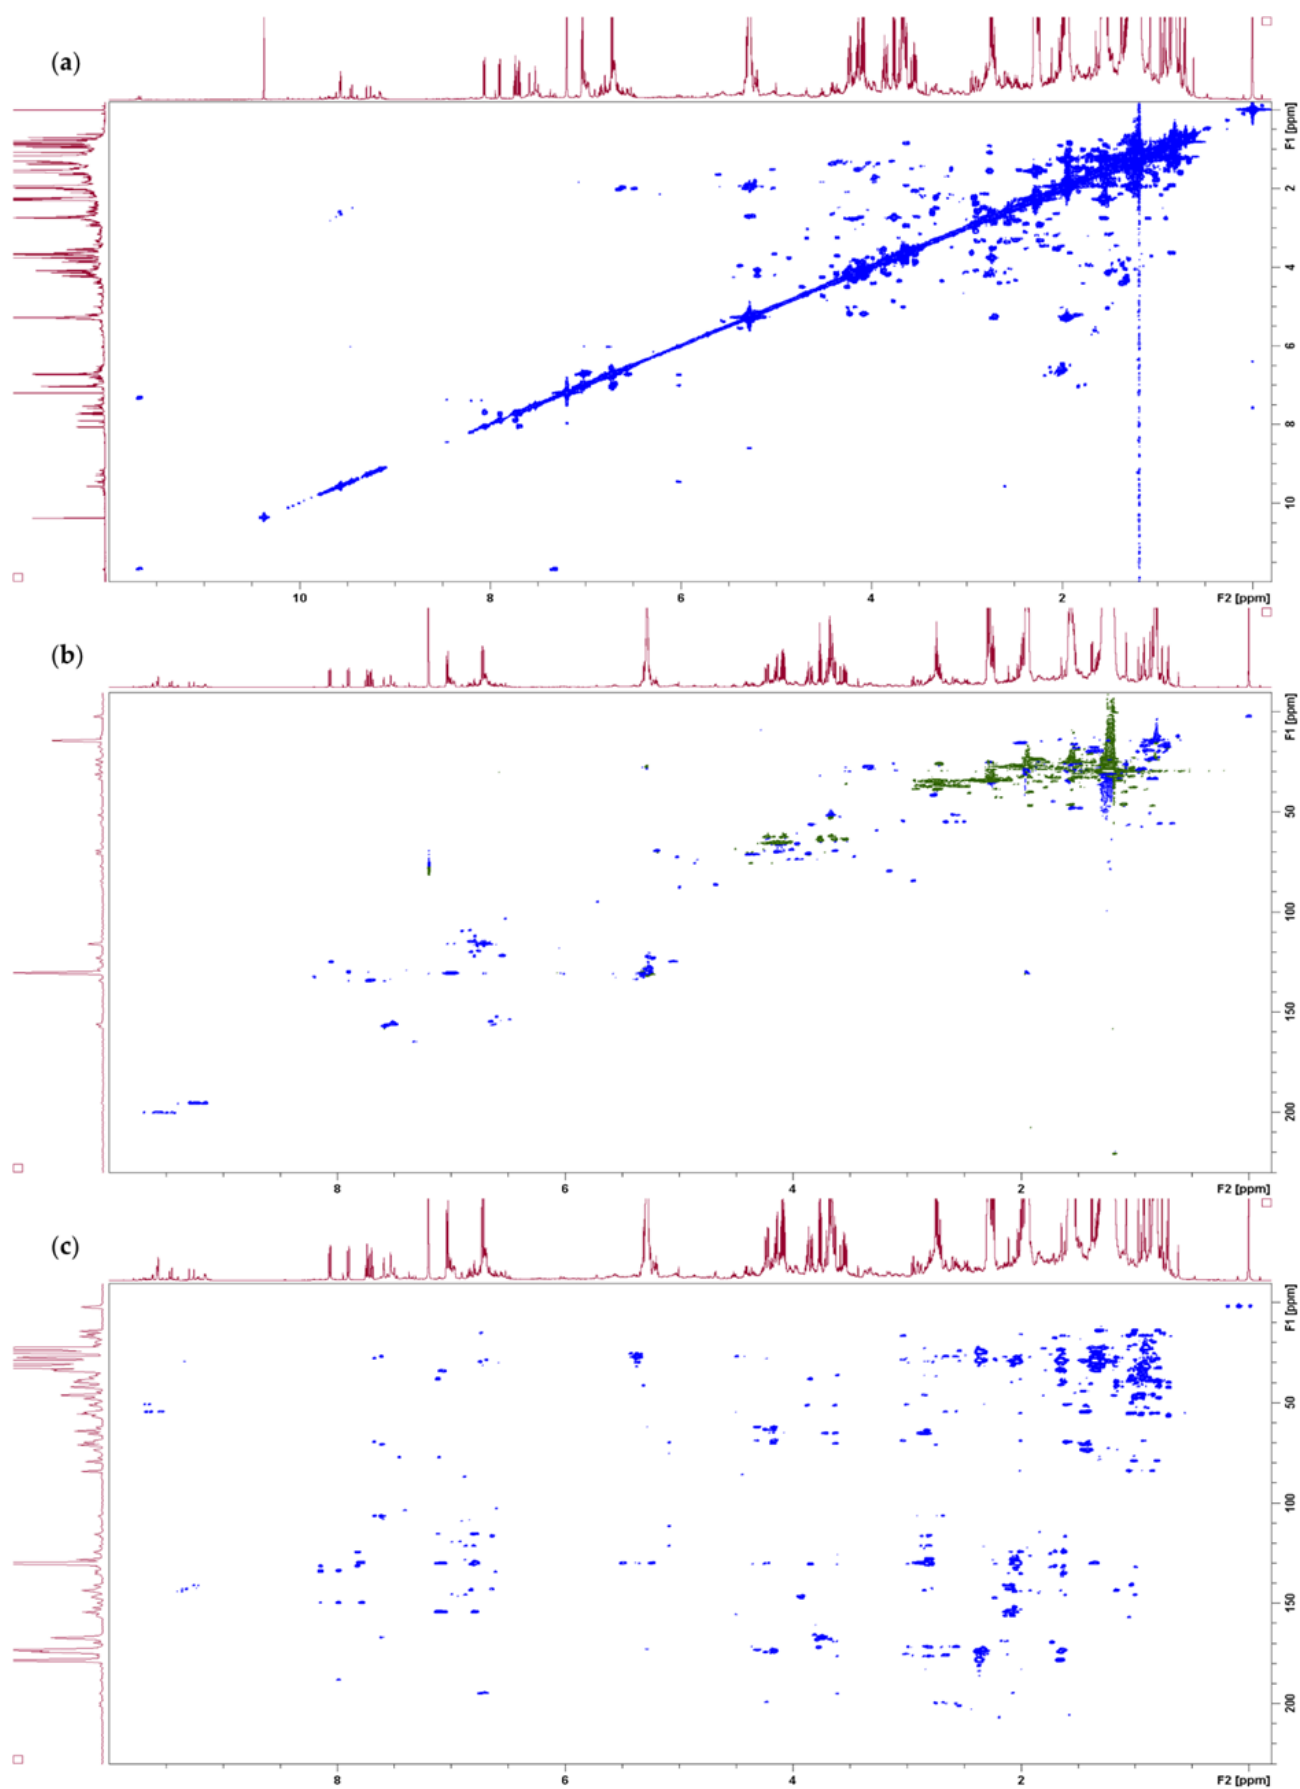

**Figure S7.** Representative 2D spectra of a Greek EVOO. (a) COSY; (b) HSQC-DEPT; (c) HMBC.

**Table S5.**  $^1\text{H}$  NMR chemical shifts and assignments for EVOOs' metabolites identified. Multiplicity ( $J$  in Hz) and functional group are also presented.

| $\delta$ $^1\text{H}$ | Multiplicity/Functional group                              | Proposed Compound                                                                                                                                            |
|-----------------------|------------------------------------------------------------|--------------------------------------------------------------------------------------------------------------------------------------------------------------|
| 0.26                  | d / -CH <sub>2</sub> - (exo, H-19)                         | Cycloartenol/cyclobranol/24-methylenecycloartanol                                                                                                            |
| 0.48                  | s / -CH <sub>3</sub> (H-18)                                | Gramisterol/citrostadienol/ $\Delta$ 7-avenasterol/ $\Delta$ 7-campesterol                                                                                   |
| 0.49                  | d / -CH <sub>2</sub> - (endo, H-19)                        | Cycloartenol/cyclobranol/24-methylenecycloartanol                                                                                                            |
| 0.61                  | s / -CH <sub>3</sub> (H-18)                                | $\beta$ -sitosterol/ $\Delta$ 5-avenasterol/ $\Delta$ 5-campesterol                                                                                          |
| 0.71                  | s / -CH <sub>3</sub>                                       | Triterpene                                                                                                                                                   |
| 0.72                  | s / -CH <sub>3</sub>                                       | Triterpene                                                                                                                                                   |
| 0.73                  | s / -CH <sub>3</sub>                                       | Triterpene                                                                                                                                                   |
| 0.76                  | s / -CH <sub>3</sub>                                       | Triterpene                                                                                                                                                   |
| 0.79                  | s / -CH <sub>3</sub>                                       | Triterpene                                                                                                                                                   |
| 0.81-0.83             | t / -CH <sub>3</sub>                                       | Saturated, oleic and/or $\omega$ -7 acyl groups                                                                                                              |
| 0.84                  | overlapping signal / -CH <sub>3</sub>                      | Triterpene /Linoleic acyl groups                                                                                                                             |
| 0.85                  | s / -CH <sub>3</sub>                                       | Triterpene                                                                                                                                                   |
| 0.87                  | s / -CH <sub>3</sub>                                       | Triterpene                                                                                                                                                   |
| 0.92                  | s / -CH <sub>3</sub>                                       | Triterpene                                                                                                                                                   |
| 0.93                  | s / -CH <sub>3</sub>                                       | Triterpene                                                                                                                                                   |
| 0.95                  | s / -CH <sub>3</sub>                                       | Triterpene                                                                                                                                                   |
| 0.96                  | s / -CH <sub>3</sub>                                       | Triterpene                                                                                                                                                   |
| 0.97                  | s / -CH <sub>3</sub>                                       | Triterpene                                                                                                                                                   |
| 1.08                  | s / -CH <sub>3</sub>                                       | Triterpene                                                                                                                                                   |
| 1.19                  | m / (-CH <sub>2</sub> ) <sub>n</sub>                       | SFA chains                                                                                                                                                   |
| 1.24                  | m / (-CH <sub>2</sub> ) <sub>n</sub>                       | UFA chains                                                                                                                                                   |
| 1.31-1.38             | d ( $J=6.7$ Hz) / -CH <sub>3</sub> (H-10)                  | Elenolic acid/elenolic acid methyl-or ethylester/Monoaldehydic form of ligstroside aglycon (MFLA)/monoaldehydic form of oleuropein aglycon (MFOA) (5S,8R,9S) |
| 1.46-1.52             | d ( $J=6.7$ Hz) / -CH <sub>3</sub> (H-10)                  | Elenolic acid/elenolic acid methyl-or ethylester/MFLA/MFOA (5S,8S,9S)                                                                                        |
| 1.53                  | s / -CH <sub>3</sub> (H-8/H-9)                             | Squalene                                                                                                                                                     |
| 1.56                  | m / -OCO-CH <sub>2</sub> -CH <sub>2</sub> -                | TAGs - Acyl groups                                                                                                                                           |
| 1.57                  | m / -OCO-CH <sub>2</sub> -CH <sub>2</sub> -                | TAGs - Acyl groups                                                                                                                                           |
| 1.61                  | s / -CH <sub>3</sub> (H-10)                                | Squalene                                                                                                                                                     |
| 1.64                  | s / CH <sub>3</sub> -COO- (H-9)                            | Acetoxypinoresinol                                                                                                                                           |
| 1.95                  | m / -CH <sub>2</sub> -CH=CH-                               | TAGs - Acyl groups                                                                                                                                           |
| 1.99                  | d ( $J=7.1$ Hz) / -CH <sub>3</sub> (H-10)                  | Oleacein                                                                                                                                                     |
| 2.00                  | d ( $J=7.1$ Hz) / -CH <sub>3</sub> (H-10)                  | Oleacein/Oleocanthal                                                                                                                                         |
| 2.01                  | d ( $J=7.1$ Hz) / -CH <sub>3</sub> (H-10)                  | Oleocanthal                                                                                                                                                  |
| 2.26-2.31             | m / -OCO-CH <sub>2</sub> -                                 | TAGs - Acyl groups                                                                                                                                           |
| 2.71                  | t / =HC-CH <sub>2</sub> -CH=                               | Linoleic acyl groups                                                                                                                                         |
| 2.84-2.89             | ddd ( $J=18.4/8.2/1.1$ Hz) / -CH <sub>2</sub> -CH=O (H-4a) | Oleacein                                                                                                                                                     |
| 2.88-2.93             | ddd ( $J=18.4/8.7/1.2$ Hz) / -CH <sub>2</sub> -CH=O (H-4a) | Oleocanthal                                                                                                                                                  |
| 2.94                  | d ( $J=9.6$ Hz) / -CH(OH)-                                 | Triterpene                                                                                                                                                   |

|           |                                                                                 |                              |
|-----------|---------------------------------------------------------------------------------|------------------------------|
| 3.15      | dd ( $J=4.5/11.3$ Hz) / $-\underline{\text{CH}}(\text{OH})-$                    | Triterpene                   |
| 3.52-3.56 | dd ( $J=5.8/11.5$ Hz) / $-\underline{\text{CH}}_2\text{-OCO-}$<br>(H-3'a)       | Glycerol in 1-MAG            |
| 3.65      | s / $-\text{OCH}_3$ (H-12)                                                      | MFLA (5S, <u>8R</u> ,9S)     |
| 3.68      | s / $-\text{OCH}_3$ (H-12)                                                      | MFOA (5S, <u>8R</u> ,9S)     |
| 3.83      | s / $-\text{OCH}_3$ (H-7'')                                                     | Acetoxypinoresinol           |
| 3.86      | s / $-\text{OCH}_3$ (H-7')                                                      | Acetoxypinoresinol           |
| 4.08      | dd ( $J=6.2/11.7$ Hz) / $-\underline{\text{CH}}_2\text{-OCO-}$<br>(H-1'a/H-3'a) | Glycerol in sn-1,3 DAG       |
| 4.09      | dd ( $J=6.1/11.7$ Hz) / $-\underline{\text{CH}}_2\text{-OCO-}$<br>(H-1'a/H-3'a) | Glycerol in TAG              |
| 4.14      | dd ( $J=4.5/11.7$ Hz) / $-\underline{\text{CH}}_2\text{-OCO-}$<br>(H-1'b/H-3'b) | Glycerol in sn-1,3 DAG       |
| 4.25      | dd / $-\underline{\text{CH}}_2\text{-OCO-}$ (H-1'a/H-1'b)                       | Glycerol in TAG              |
| 4.26      | dd / $-\underline{\text{CH}}_2\text{-OCO-}$ (H-1'b)                             | Glycerol in sn-1,2 DAG       |
| 4.68      | d ( $J=4.9$ Hz) / tetrahydrofuranic<br>H (H-6)                                  | Acetoxypinoresinol           |
| 5.00      | s / tetrahydrofuranic H (H-2)                                                   | Acetoxypinoresinol           |
| 5.22-5.23 | m / olefinic H (H-12)                                                           | Triterpene                   |
| 5.24-5.33 | m / $-\underline{\text{CH}}=\underline{\text{CH}}-$                             | TAGs - Acyl groups           |
| 6.65      | d ( $J=1.9$ Hz) / aromatic H (H-4 or<br>H-4')                                   | Hydroxytyrosol & derivatives |
| 6.69-6.74 | d ( $J=8.0$ Hz) / aromatic H (H-7 or<br>H-7')                                   | Hydroxytyrosol & derivatives |
| 6.69-6.74 | d ( $J=8.5$ Hz) / aromatic H (H-<br>5/H-7 or<br>H-5'/H7')                       | Tyrosol & derivatives        |
| 6.96-7.05 | d ( $J=8.5$ Hz) / aromatic H (H-<br>4/H-8 or<br>H-4'/H8')                       | Tyrosol & derivatives        |
| 7.49      | brs / $-\text{O}-\underline{\text{CH}}=$ (H-3)                                  | MFLA (5S, <u>8R</u> ,9S)     |
| 7.52      | brs / $-\text{O}-\underline{\text{CH}}=$ (H-3)                                  | MFOA (5S, <u>8R</u> ,9S)     |
| 7.55      | brs / $-\text{O}-\underline{\text{CH}}=$ (H-3)                                  | MFLA (5S, <u>8S</u> ,9S)     |
| 7.58      | brs / $-\text{O}-\underline{\text{CH}}=$ (H-3)                                  | MFOA (5S, <u>8S</u> ,9S)     |
| 9.14      | d ( $J=1.9$ Hz) / $-\text{CH}=\text{O}$ (H-1)                                   | Oleacein                     |
| 9.17      | d ( $J=1.9$ Hz) / $-\text{CH}=\text{O}$ (H-1)                                   | Oleocanthal                  |
| 9.45      | brd ( $J=1.8$ Hz) / $-\text{CH}=\text{O}$ (H-1)                                 | MFLA (5S, <u>8R</u> ,9S)     |
| 9.48      | brd ( $J=1.8$ Hz) / $-\text{CH}=\text{O}$ (H-1)                                 | MFOA (5S, <u>8R</u> ,9S)     |
| 9.50      | brd ( $J=1.8$ Hz) / $-\text{CH}=\text{O}$ (H-1)                                 | MFLA (5S, <u>8S</u> ,9S)     |
| 9.53      | brd ( $J=1.8$ Hz) / $-\text{CH}=\text{O}$ (H-1)                                 | MFOA (5S, <u>8S</u> ,9S)     |
| 9.57      | brs / $-\text{CH}=\text{O}$ (H-3)                                               | Oleocanthal                  |
| 9.58      | brs / $-\text{CH}=\text{O}$ (H-3)                                               | Olaecin                      |

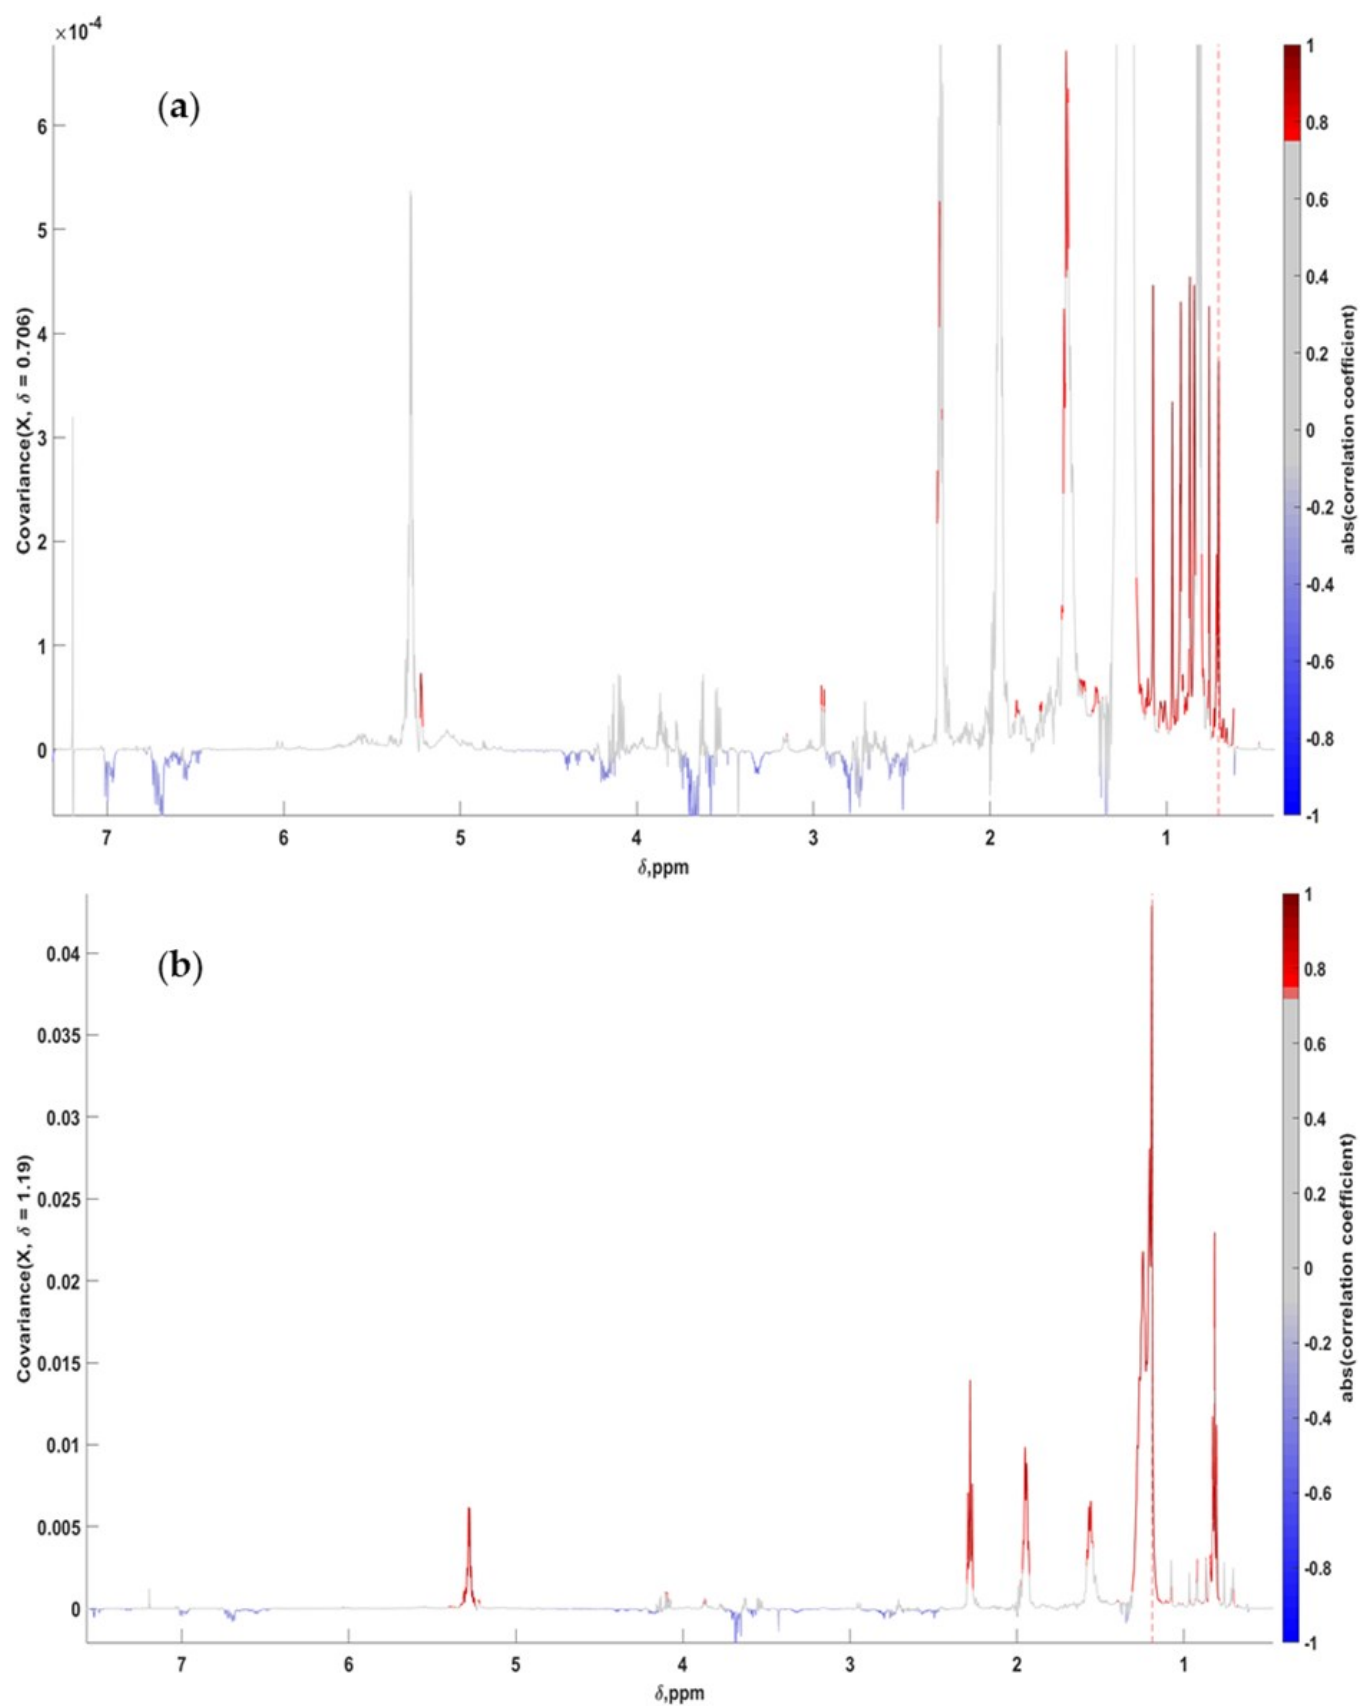

**Figure S8.** STOCSY 1D pseudo-NMR spectra. Correlation coefficients to the other signals in the median EVOO NMR spectrum are color-encoded. (a) Triterpenes: "driver peak" was at 0.706 ppm; (b) Fatty acids: "driver peak" was at 1.190 ppm.

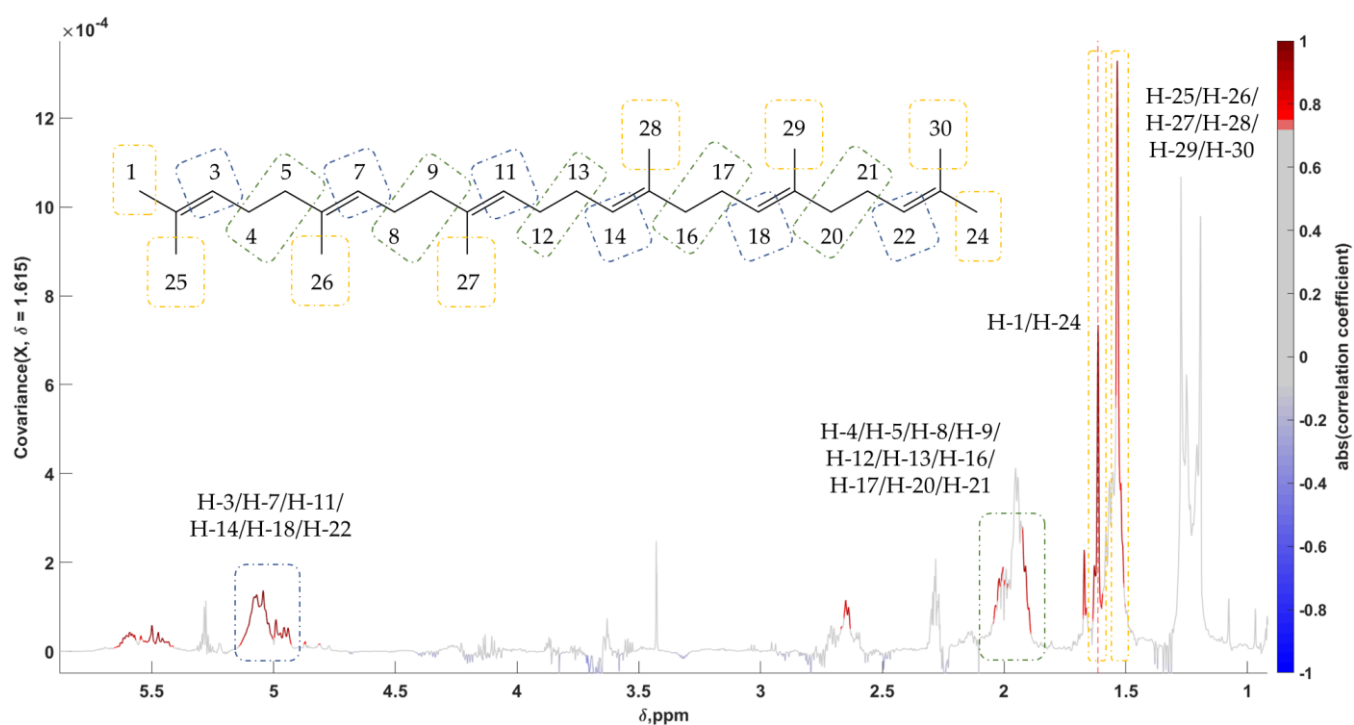

**Figure S9.** STOCSY 1D pseudo-NMR spectrum of squalene. Correlation coefficients to the other signals in the median EVOO NMR spectrum are color-encoded: “driver peak” was at 1.615 ppm.

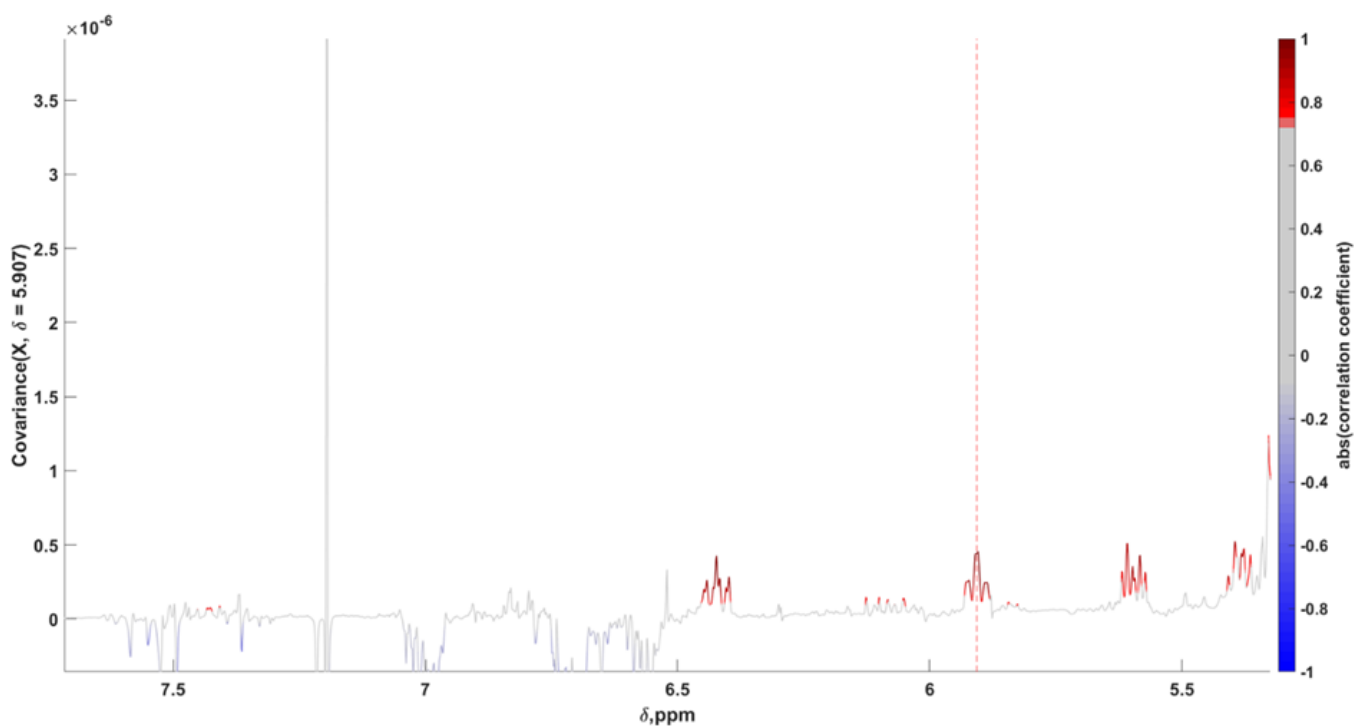

**Figure S10.** STOCSY 1D pseudo-NMR spectrum of an unknown biomarker. Correlation coefficients to the other signals in the median olive oil NMR spectrum are color-encoded: “driver peak” was at 5.907 ppm.

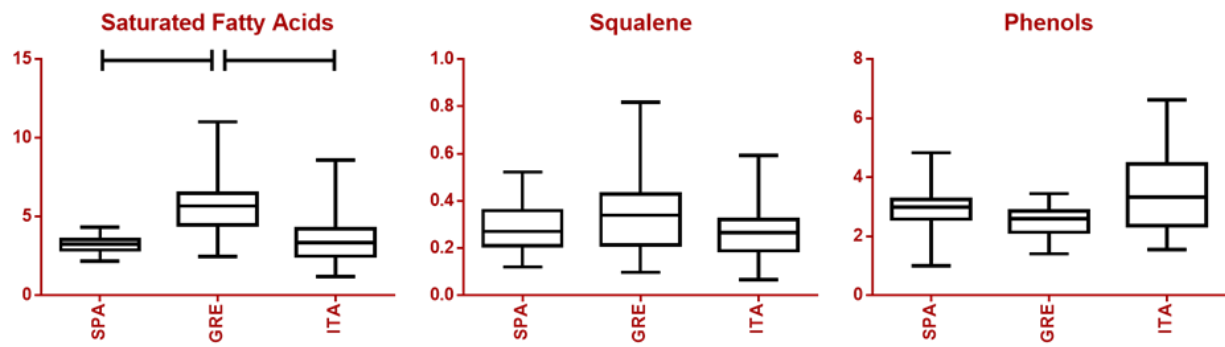

**Figure S11.** Box plots of a selection of statistically significant markers in the European sample set. Specifically, Saturated fatty acids (SFAs), Squalene and Total Phenols are depicted (vertical axis expressed in normalized intensity). SPA: Spain, GRE: Greece, ITA: Italy.

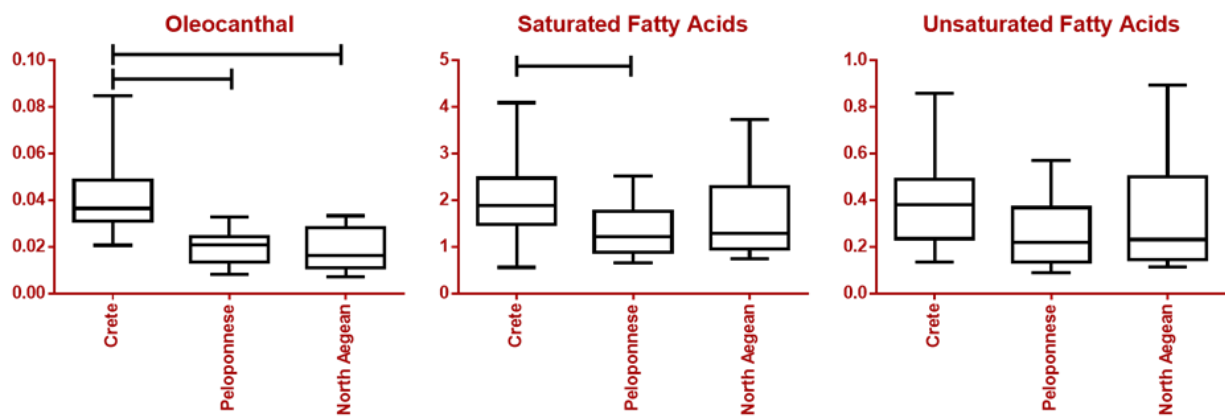

**Figure S12.** Box plots of a selection of statistically significant markers in the Greek sample set. Specifically, Oleocanthal, SFAs and Unsaturated fatty acids (UFAs) are depicted (vertical axis expressed in normalized intensity).
